# Supplementary material for: Total Cholesterol Variability and the Risk of Osteoporotic Fractures: A Nationwide Population-Based Cohort Study
Source: MDPI journal article supplement (doi:10.3390/jpm13030509), 2023-03-11
Supplement: s1 [file s1]

## Supplementary Methods

Hypertension was defined as satisfying one of the following criteria:

1) at least one claim of diagnostic codes (International Classification of Diseases, Tenth Revision [ICD-10] I10–I15) with the prescription of an antihypertensive agent, 2) two or more claims of diagnostic codes (ICD-10 codes E11–I14), 3) systolic/diastolic blood pressure  $\geq$  140/90 mmHg, or 4) self-reported hypertension in the questionnaire.

Diabetes mellitus was defined as satisfying one of the following criteria:

1) at least one claim of diagnostic codes (ICD-10 codes E11–I14) with the prescription of an antidiabetic agent, 2) two or more claims of diagnostic codes (ICD-10 codes E11–I14), 3) fasting serum glucose level  $\geq$  7.0 mmol/L, or 4) self-reported diabetes mellitus in the questionnaire.

Dyslipidemia was defined as satisfying one of the following criteria: 1) at least one claim of diagnostic codes (ICD-10 code E78) with the prescription of a dyslipidemia-related agent, including statins, 2) two or more claims of diagnostic codes (ICD-10 code E78), 3) TC  $\geq$  240 mg/dL.

Stroke was defined as two or more claims of diagnostic code (ICD-10 codes I60–I63) with brain CT/MRI and hospital admission.

Atrial fibrillation was defined as two or more claims of diagnostic code (ICD-10 code I48).

Renal disease was defined as two or more claims of diagnostic codes (ICD-10 codes N17-19, I12-13, E082, E102, E112, E132), or estimated glomerular filtration rate less than 60 mL/min/1.73 m<sup>2</sup>.

Cancer was defined as having one admission or at least three outpatient claims of diagnostic code (ICD-10 codes C00–97) with specific registration code of ‘V027’ or ‘V193–4’
