# Supplementary material for: Total Cholesterol Variability and the Risk of Osteoporotic Fractures: A Nationwide Population-Based Cohort Study
Source: MDPI journal article supplement (doi:10.3390/jpm13030509), 2023-03-11
Supplement: s1 [file s1]

Table S1. Risk factors for the occurrence of osteoporotic fractures.

| Variables                             | Multivariable model (1) |         |                         |         | Multivariable model (2) |         |
|---------------------------------------|-------------------------|---------|-------------------------|---------|-------------------------|---------|
|                                       | Crude HR<br>(95% CI)    | P-value | Adjusted HR<br>(95% CI) | P-value | Adjusted HR<br>(95% CI) | P-value |
| Age, years                            | 1.08<br>(1.07, 1.08)    | <.001   | 1.07<br>(1.06, 1.07)    | <.001   | 1.07<br>(1.06, 1.07)    | <.001   |
| Sex                                   |                         |         |                         |         |                         |         |
| Male                                  | 1 (reference)           |         | 1 (reference)           |         | 1 (reference)           |         |
| Female                                | 2.93<br>(2.86, 2.99)    | <.001   | 2.74<br>(2.66, 2.83)    | <.001   | 2.78<br>(2.69, 2.86)    | <.001   |
| Body mass index (kg/m <sup>2</sup> )  | 0.97<br>(0.97, 0.98)    | <.001   | 0.98<br>(0.97, 0.98)    | <.001   | 0.98<br>(0.98, 0.98)    | <.001   |
| Household income                      |                         |         |                         |         |                         |         |
| Q1, lowest                            | 1 (reference)           |         | 1 (reference)           |         | 1 (reference)           |         |
| Q2                                    | 0.81<br>(0.79, 0.83)    | <.001   | 1.00<br>(0.97, 1.03)    | 0.964   | 1.00<br>(0.97, 1.03)    | 0.965   |
| Q3                                    | 0.66<br>(0.64, 0.68)    | <.001   | 0.96<br>(0.93, 0.99)    | 0.010   | 0.96<br>(0.93, 0.99)    | 0.008   |
| Q4, highest                           | 0.45<br>(0.44, 0.47)    | <.001   | 0.80<br>(0.77, 0.83)    | <.001   | 0.80<br>(0.77, 0.83)    | <.001   |
| Smoking status                        |                         |         |                         |         |                         |         |
| Never                                 | 1 (reference)           |         | 1 (reference)           |         | 1 (reference)           |         |
| Former                                | 0.48<br>(0.47, 0.50)    | <.001   | 0.96<br>(0.91, 1.00)    | 0.041   | 0.96<br>(0.92, 1.00)    | 0.053   |
| Current                               | 0.59<br>(0.57, 0.61)    | <.001   | 1.12<br>(1.08, 1.17)    | <.001   | 1.13<br>(1.09, 1.17)    | <.001   |
| Alcohol consumption (days/week)       |                         |         |                         |         |                         |         |
| None                                  | 1 (reference)           |         | 1 (reference)           |         | 1 (reference)           |         |
| 1-4                                   | 0.62<br>(0.60, 0.64)    | <.001   | 1.04<br>(1.01, 1.08)    | 0.007   | 1.05<br>(1.01, 1.08)    | 0.006   |
| ≥ 5                                   | 1.00<br>(0.94, 1.07)    | 0.934   | 1.35<br>(1.26, 1.44)    | <.001   | 1.35<br>(1.26, 1.44)    | <.001   |
| Regular physical activity (days/week) |                         |         |                         |         |                         |         |
| None                                  | 1 (reference)           |         | 1 (reference)           |         | 1 (reference)           |         |
| 1-4                                   | 0.65<br>(0.63, 0.66)    | <.001   | 0.92<br>(0.90, 0.94)    | <.001   | 0.92<br>(0.90, 0.94)    | <.001   |
| ≥ 5                                   | 0.83<br>(0.80, 0.87)    | <.001   | 0.93<br>(0.90, 0.97)    | 0.001   | 0.93<br>(0.90, 0.97)    | 0.001   |
| Comorbidities                         |                         |         |                         |         |                         |         |
| Hypertension                          | 1.25<br>(1.23, 1.28)    | <.001   | 1.01<br>(0.98, 1.03)    | 0.667   | 1.00<br>(0.98, 1.03)    | 0.898   |
| Diabetes mellitus                     | 1.22<br>(1.18, 1.25)    | <.001   | 1.07<br>(1.04, 1.11)    | <.001   | 1.07<br>(1.04, 1.10)    | <.001   |
| Dyslipidemia                          | 1.21<br>(1.19, 1.24)    | <.001   | 1.00<br>(0.97, 1.03)    | 0.910   | 1.04<br>(1.01, 1.07)    | 0.009   |
| Stroke                                | 1.73<br>(1.64, 1.84)    | <.001   | 1.22<br>(1.15, 1.29)    | <.001   | 1.21<br>(1.14, 1.28)    | <.001   |
| Atrial fibrillation                   | 1.38<br>(1.24, 1.54)    | <.001   | 1.17<br>(1.05, 1.30)    | 0.004   | 1.15<br>(1.04, 1.28)    | 0.009   |
| Renal disease                         | 1.29<br>(1.21, 1.38)    | <.001   | 1.07<br>(1.00, 1.14)    | 0.061   | 1.05<br>(0.98, 1.13)    | 0.134   |
| Cancer                                | 1.29<br>(1.22, 1.35)    | <.001   | 1.17<br>(1.11, 1.23)    | <.001   | 1.16<br>(1.10, 1.22)    | <.001   |
| On lipid-lowering agent               | 0.89<br>(0.82, 0.96)    | <.001   | 0.92<br>(0.87, 0.97)    | 0.002   | 0.91<br>(0.88, 0.94)    | 0.007   |
| Mean TC (mg/dL)                       | 1.03<br>(1.01, 1.05)    | 0.005   |                         |         | 1.02<br>(1.01, 1.04)    | <.001   |
| TC variability                        |                         |         |                         |         |                         |         |
| CV (%)                                |                         |         |                         |         |                         |         |
| Q1                                    | 1 (reference)           |         | 1 (reference)           |         | 1 (reference)           |         |
| Q2                                    | 1.02<br>(0.99, 1.05)    | 0.238   | 1.02<br>(0.99, 1.06)    | 0.230   | 1.02<br>(0.99, 1.05)    | 0.282   |
| Q3                                    | 1.06<br>(1.02, 1.09)    | <.001   | 1.06<br>(1.03, 1.10)    | <.001   | 1.06<br>(1.02, 1.09)    | 0.001   |
| Q4                                    | 1.12<br>(1.08, 1.16)    | <.001   | 1.11<br>(1.08, 1.15)    | <.001   | 1.10<br>(1.07, 1.14)    | <.001   |

|         |                      |       |                      |       |                      |       |
|---------|----------------------|-------|----------------------|-------|----------------------|-------|
| SD      |                      |       |                      |       |                      |       |
| Q1      | 1 (reference)        |       | 1 (reference)        |       | 1 (reference)        |       |
| Q2      | 0.99<br>(0.94, 1.03) | 0.582 | 0.99<br>(0.95, 1.02) | 0.459 | 0.99<br>(0.96, 1.03) | 0.724 |
| Q3      | 1.04<br>(1.00, 1.06) | 0.067 | 1.03<br>(0.99, 1.06) | 0.153 | 1.04<br>(1.00, 1.07) | 0.027 |
| Q4      | 1.12<br>(1.04, 1.20) | <.001 | 1.07<br>(1.04, 1.11) | <.001 | 1.10<br>(1.06, 1.13) | <.001 |
| VIM (%) |                      |       |                      |       |                      |       |
| Q1      | 1 (reference)        |       | 1 (reference)        |       | 1 (reference)        |       |
| Q2      | 0.99<br>(0.94, 1.03) | 0.682 | 0.99<br>(0.95, 1.02) | 0.444 | 0.99<br>(0.96, 1.03) | 0.704 |
| Q3      | 1.03<br>(1.00, 1.05) | 0.053 | 1.03<br>(0.99, 1.06) | 0.156 | 1.04<br>(1.00, 1.07) | 0.027 |
| Q4      | 1.12<br>(1.03, 1.21) | <.001 | 1.07<br>(1.04, 1.11) | <.001 | 1.10<br>(1.06, 1.13) | <.001 |

Multivariable model (1) was adjusted for age, sex, body mass index, income levels, smoking, alcohol consumption, regular physical activity, hypertension, diabetes mellitus, dyslipidemia, stroke, atrial fibrillation, renal disease, cancer, and on lipid-lowering agent.

Multivariable model (2) was adjusted for age, sex, body mass index, income levels, smoking, alcohol consumption, regular physical activity, hypertension, diabetes mellitus, dyslipidemia, stroke, atrial fibrillation, renal disease, cancer, on lipid-lowering agent, and mean TC. HR, hazard ratio; CI, confidence interval; Q, quartile; TC, total cholesterol; CV, coefficient of variation; SD, standard deviation; VIM, variability independent of the mean.

Table S2. Risk factors for the occurrence of osteoporotic fractures (landmark analysis).

| Variables                             | Multivariable model (1) |         |                         | Multivariable model (2) |                         |         |
|---------------------------------------|-------------------------|---------|-------------------------|-------------------------|-------------------------|---------|
|                                       | Crude HR<br>(95% CI)    | P-value | Adjusted HR<br>(95% CI) | P-value                 | Adjusted HR<br>(95% CI) | P-value |
| Age, years                            | 1.08<br>(1.07, 1.08)    | <.001   | 1.07<br>(1.06, 1.07)    | <.001                   | 1.07<br>(1.06, 1.07)    | <.001   |
| Sex                                   |                         |         |                         |                         |                         |         |
| Male                                  | 1 (reference)           |         | 1 (reference)           |                         | 1 (reference)           |         |
| Female                                | 2.94<br>(2.87, 3.01)    | <.001   | 2.75<br>(2.67, 2.84)    | <.001                   | 2.79<br>(2.70, 2.87)    | <.001   |
| Body mass index (kg/m <sup>2</sup> )  | 0.97<br>(0.97, 0.98)    | <.001   | 0.98<br>(0.97, 0.98)    | <.001                   | 0.98<br>(0.98, 0.98)    | <.001   |
| Household income                      |                         |         |                         |                         |                         |         |
| Q1, lowest                            | 1 (reference)           |         | 1 (reference)           |                         | 1 (reference)           |         |
| Q2                                    | 0.81<br>(0.78, 0.83)    | <.001   | 1.00<br>(0.97, 1.03)    | 0.948                   | 1.00<br>(0.97, 1.03)    | 0.977   |
| Q3                                    | 0.66<br>(0.64, 0.68)    | <.001   | 0.96<br>(0.93, 0.99)    | 0.009                   | 0.96<br>(0.93, 0.99)    | 0.007   |
| Q4, highest                           | 0.45<br>(0.44, 0.47)    | <.001   | 0.80<br>(0.77, 0.83)    | <.001                   | 0.80<br>(0.77, 0.83)    | <.001   |
| Smoking status                        |                         |         |                         |                         |                         |         |
| Never                                 | 1 (reference)           |         | 1 (reference)           |                         | 1 (reference)           |         |
| Former                                | 0.48<br>(0.47, 0.50)    | <.001   | 0.96<br>(0.92, 1.00)    | 0.058                   | 0.96<br>(0.92, 1.00)    | 0.075   |
| Current                               | 0.59<br>(0.57, 0.61)    | <.001   | 1.12<br>(1.08, 1.17)    | <.001                   | 1.13<br>(1.09, 1.17)    | <.001   |
| Alcohol consumption (days/week)       |                         |         |                         |                         |                         |         |
| None                                  | 1 (reference)           |         | 1 (reference)           |                         | 1 (reference)           |         |
| 1-4                                   | 0.62<br>(0.60, 0.64)    | <.001   | 1.05<br>(1.01, 1.08)    | 0.006                   | 1.05<br>(1.01, 1.08)    | 0.005   |
| ≥ 5                                   | 0.99<br>(0.93, 1.06)    | 0.807   | 1.34<br>(1.25, 1.43)    | <.001                   | 1.33<br>(1.25, 1.42)    | <.001   |
| Regular physical activity (days/week) |                         |         |                         |                         |                         |         |
| None                                  | 1 (reference)           |         | 1 (reference)           |                         | 1 (reference)           |         |
| 1-4                                   | 0.64<br>(0.63, 0.66)    | <.001   | 0.92<br>(0.89, 0.94)    | <.001                   | 0.92<br>(0.89, 0.94)    | <.001   |
| ≥ 5                                   | 0.83<br>(0.80, 0.87)    | <.001   | 0.93<br>(0.90, 0.97)    | 0.001                   | 0.93<br>(0.90, 0.97)    | 0.001   |
| Comorbidities                         |                         |         |                         |                         |                         |         |
| Hypertension                          | 1.26<br>(1.23, 1.29)    | <.001   | 1.01<br>(0.98, 1.03)    | 0.631                   | 1.00<br>(0.98, 1.03)    | 0.867   |
| Diabetes mellitus                     | 1.22<br>(1.19, 1.25)    | <.001   | 1.07<br>(1.04, 1.11)    | <.001                   | 1.07<br>(1.03, 1.10)    | <.001   |
| Dyslipidemia                          | 1.22<br>(1.19, 1.25)    | <.001   | 1.00<br>(0.97, 1.03)    | 0.992                   | 1.04<br>(1.01, 1.07)    | 0.005   |
| Stroke                                | 1.73<br>(1.63, 1.83)    | <.001   | 1.21<br>(1.14, 1.29)    | <.001                   | 1.20<br>(1.13, 1.28)    | <.001   |
| Atrial fibrillation                   | 1.38<br>(1.24, 1.53)    | <.001   | 1.16<br>(1.05, 1.30)    | 0.006                   | 1.15<br>(1.03, 1.28)    | 0.012   |
| Renal disease                         | 1.29<br>(1.22, 1.36)    | <.001   | 1.17<br>(1.11, 1.23)    | <.001                   | 1.16<br>(1.10, 1.22)    | <.001   |
| Cancer                                | 1.30<br>(1.22, 1.39)    | <.001   | 1.07<br>(1.00, 1.15)    | 0.047                   | 1.06<br>(0.99, 1.13)    | 0.110   |
| On lipid-lowering agent               | 0.87<br>(0.80, 0.94)    | <.001   | 0.91<br>(0.85, 0.97)    | 0.002                   | 0.92<br>(0.88, 0.96)    | 0.003   |
| Mean TC (mg/dL)                       | 1.03<br>(1.01, 1.05)    | 0.005   |                         |                         | 1.02<br>(1.01, 1.04)    | <.001   |
| TC variability                        |                         |         |                         |                         |                         |         |
| CV (%)                                | 0.98<br>(0.95, 1.01)    | 0.244   | 1.02<br>(0.98, 1.05)    | 0.352                   | 1.01<br>(0.98, 1.05)    | 0.423   |
| SD                                    | 1.07<br>(1.03, 1.10)    | <.001   | 1.06<br>(1.03, 1.10)    | 0.001                   | 1.06<br>(1.02, 1.09)    | 0.002   |
| VIM (%)                               | 1.32<br>(1.28, 1.36)    | <.001   | 1.11<br>(1.08, 1.15)    | <.001                   | 1.10<br>(1.07, 1.14)    | <.001   |

Multivariable model (1) was adjusted for age, sex, body mass index, income levels, smoking, alcohol consumption, regular physical activity, hypertension, diabetes mellitus, dyslipidemia, stroke, atrial fibrillation, renal disease, cancer, and on lipid-lowering agent.

Multivariable model (2) was adjusted for age, sex, body mass index, income levels, smoking, alcohol consumption, regular physical activity, hypertension, diabetes mellitus, dyslipidemia, stroke, atrial fibrillation, renal disease, cancer, on lipid-lowering agent, and mean TC. HR, hazard ratio; CI, confidence interval; TC, total cholesterol; Q, quartile; CV, coefficient of variation; SD, standard deviation; VIM, variability independent of the mean.

Table S3. The risk for the occurrence of osteoporotic fractures according to the quartiles of total cholesterol variability (landmark analysis).

|     |                        |                  |                         |              |                                        | Multivariable model (1) |         |                   | Multivariable model (2) |         |                   |
|-----|------------------------|------------------|-------------------------|--------------|----------------------------------------|-------------------------|---------|-------------------|-------------------------|---------|-------------------|
|     | Number of participants | Number of events | Event rate (%) (95% CI) | Person-years | Incidence rate (per 1000 person-years) | Adjusted HR (95% CI)    | P-value | P-value for trend | Adjusted HR (95% CI)    | P-value | P-value for trend |
| CV  |                        |                  |                         |              |                                        |                         |         | <.001             |                         |         | <.001             |
| Q1  | 75081                  | 6591             | 8.78 (8.57, 8.99)       | 875683.04    | 7.53                                   | 1 (reference)           |         |                   | 1 (reference)           |         |                   |
| Q2  | 75082                  | 6465             | 8.61 (8.40, 8.82)       | 876409.62    | 7.38                                   | 1.02 (0.98, 1.05)       | 0.352   |                   | 1.01 (0.98, 1.05)       | 0.423   |                   |
| Q3  | 75082                  | 6993             | 9.31 (9.10, 9.53)       | 871033.92    | 8.03                                   | 1.06 (1.03, 1.10)       | 0.001   |                   | 1.06 (1.02, 1.09)       | 0.002   |                   |
| Q4  | 75081                  | 8472             | 11.28 (11.04, 11.52)    | 853877.07    | 9.92                                   | 1.11 (1.08, 1.15)       | <.001   |                   | 1.10 (1.07, 1.14)       | <.001   |                   |
| SD  |                        |                  |                         |              |                                        |                         |         | <.001             |                         |         | <.001             |
| Q1  | 75095                  | 6655             | 8.86 (8.65, 9.08)       | 874077.07    | 7.61                                   | 1 (reference)           |         |                   | 1 (reference)           |         |                   |
| Q2  | 75062                  | 6383             | 8.50 (8.30, 8.71)       | 875947.61    | 7.29                                   | 0.98 (0.95, 1.02)       | 0.297   |                   | 0.99 (0.96, 1.02)       | 0.520   |                   |
| Q3  | 75087                  | 6993             | 9.31 (9.09, 9.53)       | 871289.96    | 8.03                                   | 1.02 (0.99, 1.06)       | 0.180   |                   | 1.04 (1.00, 1.07)       | 0.031   |                   |
| Q4  | 75082                  | 8490             | 11.31 (11.07, 11.55)    | 855689.00    | 9.92                                   | 1.07 (1.03, 1.11)       | <.001   |                   | 1.10 (1.06, 1.13)       | <.001   |                   |
| VIM |                        |                  |                         |              |                                        |                         |         | <.001             |                         |         | <.001             |
| Q1  | 75081                  | 6655             | 8.86 (8.65, 9.08)       | 873915.06    | 7.62                                   | 1 (reference)           |         |                   | 1 (reference)           |         |                   |
| Q2  | 75082                  | 6383             | 8.50 (8.29, 8.71)       | 876185.09    | 7.28                                   | 0.98 (0.95, 1.02)       | 0.285   |                   | 0.99 (0.96, 1.02)       | 0.503   |                   |
| Q3  | 75082                  | 6993             | 9.31 (9.10, 9.53)       | 871219.84    | 8.03                                   | 1.02 (0.99, 1.06)       | 0.183   |                   | 1.04 (1.00, 1.07)       | 0.032   |                   |
| Q4  | 75081                  | 8490             | 11.31 (11.07, 11.55)    | 855683.66    | 9.92                                   | 1.07 (1.03, 1.11)       | <.001   |                   | 1.10 (1.06, 1.13)       | <.001   |                   |

Multivariable model (1) was adjusted for age, sex, body mass index, income levels, smoking, alcohol consumption, regular physical activity, hypertension, diabetes mellitus, dyslipidemia, stroke, atrial fibrillation, renal disease, cancer, and on lipid-lowering agent.

Multivariable model (2) was adjusted for age, sex, body mass index, income levels, smoking, alcohol consumption, regular physical activity, hypertension, diabetes mellitus, dyslipidemia, stroke, atrial fibrillation, renal disease, cancer, on lipid-lowering agent, and mean TC.

HR, hazard ratio; CI, confidence interval; CV, coefficient of variation; Q, quartile; SD, standard deviation; VIM, variability independent of the mean; TC, total cholesterol variability.

Table S4. The risk for the occurrence of osteoporotic fractures according to the quartiles of total cholesterol variability in men.

|     | Number of participants | Number of events | Event rate (%)<br>(95% CI) | Person-years | Incidence rate<br>(per 1000 person-years) | Multivariable model (1) |         |                   | Multivariable model (2) |         |                   |
|-----|------------------------|------------------|----------------------------|--------------|-------------------------------------------|-------------------------|---------|-------------------|-------------------------|---------|-------------------|
|     |                        |                  |                            |              |                                           | Adjusted HR<br>(95% CI) | P-value | P-value for trend | Adjusted HR<br>(95% CI) | P-value | P-value for trend |
| CV  |                        |                  |                            |              |                                           |                         |         | <.001             |                         |         | <.001             |
| Q1  | 57057                  | 1756             | 3.08<br>(2.94, 3.22)       | 679989.84    | 2.58                                      | 1 (reference)           |         |                   | 1 (reference)           |         |                   |
| Q2  | 57313                  | 1808             | 3.15<br>(3.01, 3.30)       | 682167.60    | 2.65                                      | 1.05<br>(0.99, 1.12)    | 0.130   |                   | 1.05<br>(0.99, 1.13)    | 0.126   |                   |
| Q3  | 55397                  | 1895             | 3.42<br>(3.27, 3.57)       | 655800.65    | 2.89                                      | 1.10<br>(1.03, 1.18)    | 0.004   |                   | 1.10<br>(1.03, 1.17)    | 0.005   |                   |
| Q4  | 51572                  | 2194             | 4.25<br>(4.08, 4.43)       | 597762.71    | 3.67                                      | 1.22<br>(1.15, 1.31)    | <.001   |                   | 1.22<br>(1.14, 1.30)    | <.001   |                   |
| SD  |                        |                  |                            |              |                                           |                         |         | <.001             |                         |         | <.001             |
| Q1  | 57927                  | 1890             | 3.26<br>(3.12, 3.41)       | 688682.71    | 2.74                                      | 1 (reference)           |         |                   | 1 (reference)           |         |                   |
| Q2  | 57691                  | 1804             | 3.13<br>(2.98, 3.27)       | 685815.45    | 2.63                                      | 0.99<br>(0.93, 1.06)    | 0.822   |                   | 1.01<br>(0.94, 1.07)    | 0.857   |                   |
| Q3  | 55227                  | 1875             | 3.40<br>(3.24, 3.55)       | 653656.47    | 2.87                                      | 1.04<br>(0.98, 1.11)    | 0.238   |                   | 1.06<br>(1.00, 1.14)    | 0.064   |                   |
| Q4  | 50494                  | 2084             | 4.13<br>(3.95, 4.30)       | 587566.19    | 3.54                                      | 1.16<br>(1.08, 1.23)    | <.001   |                   | 1.21<br>(1.13, 1.29)    | <.001   |                   |
| VIM |                        |                  |                            |              |                                           |                         |         | <.001             |                         |         | <.001             |
| Q1  | 57916                  | 1890             | 3.26<br>(3.12, 3.41)       | 688558.18    | 2.74                                      | 1 (reference)           |         |                   | 1 (reference)           |         |                   |
| Q2  | 57708                  | 1804             | 3.13<br>(2.98, 3.27)       | 686015.02    | 2.63                                      | 0.99<br>(0.93, 1.06)    | 0.813   |                   | 1.01<br>(0.94, 1.07)    | 0.867   |                   |
| Q3  | 55221                  | 1875             | 3.40<br>(3.24, 3.55)       | 653581.42    | 2.87                                      | 1.04<br>(0.98, 1.11)    | 0.240   |                   | 1.06<br>(1.00, 1.14)    | 0.065   |                   |
| Q4  | 50494                  | 2084             | 4.13<br>(3.95, 4.30)       | 587566.19    | 3.55                                      | 1.16<br>(1.08, 1.23)    | <.001   |                   | 1.21<br>(1.13, 1.29)    | <.001   |                   |

Multivariable model (1) was adjusted for age, sex, body mass index, income levels, smoking, alcohol consumption, regular physical activity, hypertension, diabetes mellitus, dyslipidemia, stroke, atrial fibrillation, renal disease, cancer, and on lipid-lowering agent.

Multivariable model (2) was adjusted for age, sex, body mass index, income levels, smoking, alcohol consumption, regular physical activity, hypertension, diabetes mellitus, dyslipidemia, stroke, atrial fibrillation, renal disease, cancer, on lipid-lowering agent, and mean TC.

HR, hazard ratio; CI, confidence interval; CV, coefficient of variation; Q, quartile; SD, standard deviation; VIM, variability independent of the mean.

Table S5. The risk for the occurrence of osteoporotic fractures according to the quartiles of total cholesterol variability in women

|     | Number of participants | Number of events | Event rate (%)<br>(95% CI) | Person-years | Incidence rate<br>(per 1000 person-years) | Multivariable model (1) |         |                   | Multivariable model (2) |         |                   |
|-----|------------------------|------------------|----------------------------|--------------|-------------------------------------------|-------------------------|---------|-------------------|-------------------------|---------|-------------------|
|     |                        |                  |                            |              |                                           | Adjusted HR<br>(95% CI) | P-value | P-value for trend | Adjusted HR<br>(95% CI) | P-value | P-value for trend |
| CV  |                        |                  |                            |              |                                           |                         |         | <.001             |                         |         | <.001             |
| Q1  | 18024                  | 1865             | 10.35<br>(9.90, 10.79)     | 208827.66    | 8.93                                      | 1 (reference)           |         |                   | 1 (reference)           |         |                   |
| Q2  | 17769                  | 1690             | 9.51<br>(9.08, 9.94)       | 207361.53    | 8.15                                      | 0.98<br>(0.92, 1.05)    | 0.524   |                   | 0.97<br>(0.91, 1.04)    | 0.348   |                   |
| Q3  | 19685                  | 1910             | 9.70<br>(9.29, 10.12)      | 229522.68    | 8.32                                      | 1.02<br>(0.96, 1.09)    | 0.553   |                   | 1.01<br>(0.95, 1.08)    | 0.805   |                   |
| Q4  | 23509                  | 2606             | 11.09<br>(10.68, 11.49)    | 271365.73    | 9.60                                      | 1.06<br>(1.02, 1.10)    | 0.003   |                   | 1.05<br>(1.02, 1.08)    | 0.002   |                   |
| SD  |                        |                  |                            |              |                                           |                         |         | <.001             |                         |         | <.001             |
| Q1  | 17168                  | 1800             | 10.48<br>(10.03, 10.94)    | 198575.39    | 9.06                                      | 1 (reference)           |         |                   | 1 (reference)           |         |                   |
| Q2  | 17371                  | 1637             | 9.42<br>(8.99, 9.86)       | 202998.12    | 8.06                                      | 0.94<br>(0.88, 1.01)    | 0.074   |                   | 0.94<br>(0.87, 1.00)    | 0.054   |                   |
| Q3  | 19860                  | 1864             | 9.38<br>(8.98, 9.79)       | 231923.82    | 8.04                                      | 0.95<br>(0.89, 1.01)    | 0.088   |                   | 0.95<br>(0.89, 1.02)    | 0.127   |                   |
| Q4  | 24588                  | 2770             | 11.27<br>(10.87, 11.66)    | 283580.26    | 9.77                                      | 1.04<br>(1.01, 1.07)    | 0.046   |                   | 1.04<br>(1.02, 1.06)    | 0.045   |                   |
| VIM |                        |                  |                            |              |                                           |                         |         | <.001             |                         |         | <.001             |
| Q1  | 17165                  | 1800             | 10.49<br>(10.03, 10.94)    | 198537.91    | 9.07                                      | 1 (reference)           |         |                   | 1 (reference)           |         |                   |
| Q2  | 17374                  | 1637             | 9.42<br>(8.99, 9.86)       | 203036.03    | 8.06                                      | 0.94<br>(0.88, 1.01)    | 0.072   |                   | 0.94<br>(0.88, 1.01)    | 0.052   |                   |
| Q3  | 19861                  | 1864             | 9.39<br>(8.98, 9.79)       | 231928.75    | 8.04                                      | 0.95<br>(0.89, 1.01)    | 0.087   |                   | 0.95<br>(0.89, 1.01)    | 0.125   |                   |
| Q4  | 24587                  | 2770             | 11.27<br>(10.87, 11.66)    | 283574.92    | 9.77                                      | 1.05<br>(1.02, 1.08)    | 0.045   |                   | 1.05<br>(1.02, 1.07)    | 0.044   |                   |

Multivariable model (1) was adjusted for age, sex, body mass index, income levels, smoking, alcohol consumption, regular physical activity, hypertension, diabetes mellitus, dyslipidemia, stroke, atrial fibrillation, renal disease, cancer, and on lipid-lowering agent.

Multivariable model (2) was adjusted for age, sex, body mass index, income levels, smoking, alcohol consumption, regular physical activity, hypertension, diabetes mellitus, dyslipidemia, stroke, atrial fibrillation, renal disease, cancer, on lipid-lowering agent, and mean TC.

HR, hazard ratio; CI, confidence interval; CV, coefficient of variation; Q, quartile; SD, standard deviation; VIM, variability independent of the mean.

Table S6. The risk for the occurrence of osteoporotic fractures according to the deciles of total cholesterol variability.

|     |                        |                  |                         |              |                                        | Multivariable model (1) |         |                   | Multivariable model (2) |         |                   |
|-----|------------------------|------------------|-------------------------|--------------|----------------------------------------|-------------------------|---------|-------------------|-------------------------|---------|-------------------|
|     | Number of participants | Number of events | Event rate (%) (95% CI) | Person-years | Incidence rate (per 1000 person-years) | Adjusted HR (95% CI)    | P-value | P-value for trend | Adjusted HR (95% CI)    | P-value | P-value for trend |
| CV  |                        |                  |                         |              |                                        |                         |         | <.001             |                         |         | <.001             |
| D1  | 30033                  | 2876             | 9.58 (9.23, 9.93)       | 348328.08    | 8.26                                   | 1 (reference)           |         |                   | 1 (reference)           |         |                   |
| D2  | 30032                  | 2563             | 8.53 (8.20, 8.86)       | 350370.05    | 7.32                                   | 1.00 (0.95, 1.06)       | 0.922   |                   | 1.00 (0.95, 1.06)       | 0.917   |                   |
| D3  | 30033                  | 2630             | 8.76 (8.42, 9.09)       | 350459.76    | 7.50                                   | 1.04 (0.99, 1.10)       | 0.124   |                   | 1.04 (0.99, 1.10)       | 0.131   |                   |
| D4  | 30032                  | 2611             | 8.69 (8.36, 9.03)       | 350449.47    | 7.45                                   | 1.02 (0.96, 1.07)       | 0.579   |                   | 1.01 (0.96, 1.07)       | 0.638   |                   |
| D5  | 30033                  | 2627             | 8.75 (8.41, 9.08)       | 349520.51    | 7.52                                   | 1.01 (0.96, 1.07)       | 0.703   |                   | 1.01 (0.96, 1.06)       | 0.789   |                   |
| D6  | 30033                  | 2753             | 9.17 (8.82, 9.51)       | 348636.72    | 7.90                                   | 1.05 (1.00, 1.11)       | 0.062   |                   | 1.05 (0.99, 1.10)       | 0.085   |                   |
| D7  | 30032                  | 2867             | 9.55 (9.20, 9.90)       | 347644.65    | 8.25                                   | 1.07 (1.01, 1.12)       | 0.015   |                   | 1.06 (1.01, 1.12)       | 0.026   |                   |
| D8  | 30033                  | 3074             | 10.24 (9.87, 10.60)     | 345839.70    | 8.89                                   | 1.10 (1.05, 1.16)       | <.001   |                   | 1.10 (1.04, 1.15)       | 0.001   |                   |
| D9  | 30033                  | 3380             | 11.25 (10.87, 11.63)    | 342391.51    | 9.87                                   | 1.13 (1.07, 1.19)       | <.001   |                   | 1.12 (1.06, 1.18)       | <.001   |                   |
| D10 | 30032                  | 3663             | 12.20 (11.80, 12.59)    | 337188.29    | 10.86                                  | 1.11 (1.05, 1.16)       | <.001   |                   | 1.10 (1.04, 1.15)       | <.001   |                   |
| SD  |                        |                  |                         |              |                                        |                         |         | <.001             |                         |         | <.001             |
| D1  | 29996                  | 2839             | 9.46 (9.12, 9.81)       | 347561.49    | 8.17                                   | 1 (reference)           |         |                   | 1 (reference)           |         |                   |
| D2  | 30058                  | 2612             | 8.69 (8.36, 9.02)       | 350220.34    | 7.46                                   | 1.03 (0.98, 1.09)       | 0.257   |                   | 1.03 (0.98, 1.09)       | 0.221   |                   |
| D3  | 30038                  | 2625             | 8.74 (8.40, 9.07)       | 349617.67    | 7.51                                   | 1.04 (0.98, 1.09)       | 0.205   |                   | 1.04 (0.99, 1.10)       | 0.143   |                   |
| D4  | 30051                  | 2567             | 8.54 (8.21, 8.87)       | 350576.72    | 7.32                                   | 1.00 (0.95, 1.06)       | 0.974   |                   | 1.01 (0.96, 1.06)       | 0.759   |                   |
| D5  | 30014                  | 2646             | 8.82 (8.48, 9.15)       | 349114.46    | 7.58                                   | 1.00 (0.95, 1.06)       | 0.897   |                   | 1.01 (0.96, 1.07)       | 0.604   |                   |
| D6  | 30041                  | 2773             | 9.23 (8.89, 9.57)       | 348828.96    | 7.95                                   | 1.05 (0.99, 1.10)       | 0.094   |                   | 1.06 (1.01, 1.12)       | 0.030   |                   |
| D7  | 30028                  | 2844             | 9.47 (9.12, 9.82)       | 347476.51    | 8.18                                   | 1.04 (0.99, 1.09)       | 0.167   |                   | 1.06 (1.00, 1.11)       | 0.047   |                   |

|     |       |      |                         |           |       |                      |       |                      |       |
|-----|-------|------|-------------------------|-----------|-------|----------------------|-------|----------------------|-------|
| D8  | 30039 | 3061 | 10.19<br>(9.83, 10.55)  | 346104.49 | 8.84  | 1.07<br>(1.02, 1.13) | 0.009 | 1.09<br>(1.04, 1.15) | 0.001 |
| D9  | 30024 | 3466 | 11.54<br>(11.16, 11.93) | 342274.55 | 10.13 | 1.13<br>(1.08, 1.19) | <.001 | 1.16<br>(1.10, 1.22) | <.001 |
| D10 | 30037 | 3611 | 12.02<br>(11.63, 12.41) | 339053.56 | 10.65 | 1.06<br>(1.01, 1.11) | 0.029 | 1.09<br>(1.04, 1.15) | 0.001 |
| VIM |       |      |                         |           |       |                      | <.001 |                      | <.001 |
| D1  | 30032 | 2846 | 9.48<br>(9.13, 9.82)    | 347937.97 | 8.18  | 1 (reference)        |       | 1 (reference)        |       |
| D2  | 30033 | 2608 | 8.68<br>(8.35, 9.02)    | 349951.01 | 7.45  | 1.03<br>(0.98, 1.09) | 0.269 | 1.03<br>(0.98, 1.09) | 0.235 |
| D3  | 30033 | 2624 | 8.74<br>(8.40, 9.07)    | 349578.79 | 7.51  | 1.03<br>(0.98, 1.09) | 0.224 | 1.04<br>(0.99, 1.10) | 0.158 |
| D4  | 30032 | 2563 | 8.53<br>(8.20, 8.86)    | 350373.26 | 7.32  | 1.00<br>(0.95, 1.05) | 0.978 | 1.01<br>(0.95, 1.06) | 0.807 |
| D5  | 30033 | 2648 | 8.82<br>(8.48, 9.15)    | 349325.10 | 7.58  | 1.00<br>(0.95, 1.06) | 0.918 | 1.01<br>(0.96, 1.07) | 0.625 |
| D6  | 30033 | 2775 | 9.24<br>(8.90, 9.58)    | 348720.27 | 7.96  | 1.05<br>(0.99, 1.10) | 0.094 | 1.06<br>(1.01, 1.12) | 0.030 |
| D7  | 30032 | 2842 | 9.46<br>(9.12, 9.81)    | 347535.01 | 8.18  | 1.04<br>(0.98, 1.09) | 0.186 | 1.05<br>(1.00, 1.11) | 0.054 |
| D8  | 30033 | 3061 | 10.19<br>(9.83, 10.55)  | 346029.05 | 8.85  | 1.07<br>(1.02, 1.13) | 0.010 | 1.09<br>(1.04, 1.15) | 0.001 |
| D9  | 30033 | 3467 | 11.54<br>(11.16, 11.93) | 342376.50 | 10.13 | 1.13<br>(1.08, 1.19) | <.001 | 1.15<br>(1.10, 1.21) | <.001 |
| D10 | 30032 | 3610 | 12.02<br>(11.63, 12.41) | 339001.77 | 10.65 | 1.06<br>(1.01, 1.11) | 0.032 | 1.09<br>(1.04, 1.15) | 0.001 |

Multivariable model (1) was adjusted for age, sex, body mass index, income levels, smoking, alcohol consumption, regular physical activity, hypertension, diabetes mellitus, dyslipidemia, stroke, atrial fibrillation, renal disease, cancer, and on lipid-lowering agent.

Multivariable model (2) was adjusted for age, sex, body mass index, income levels, smoking, alcohol consumption, regular physical activity, hypertension, diabetes mellitus, dyslipidemia, stroke, atrial fibrillation, renal disease, cancer, on lipid-lowering agent, and mean TC.

HR, hazard ratio; CI, confidence interval; CV, coefficient of variation; D, decile; SD, standard deviation; VIM, variability independent of the mean.

Table S7. The risk for the occurrence of osteoporotic fracture according to the deciles of total cholesterol variability (landmark analysis).

|     |                        |                  |                         |              |                                        | Multivariable model (1) |         |                   | Multivariable model (2) |         |                   |
|-----|------------------------|------------------|-------------------------|--------------|----------------------------------------|-------------------------|---------|-------------------|-------------------------|---------|-------------------|
|     | Number of participants | Number of events | Event rate (%) (95% CI) | Person-years | Incidence rate (per 1000 person-years) | Adjusted HR (95% CI)    | P-value | P-value for trend | Adjusted HR (95% CI)    | P-value | P-value for trend |
| CV  |                        |                  |                         |              |                                        |                         |         | <.001             |                         |         | <.001             |
| D1  | 30033                  | 2828             | 9.42<br>(9.07, 9.76)    | 348898.27    | 8.11                                   | 1 (reference)           |         |                   | 1 (reference)           |         |                   |
| D2  | 30032                  | 2523             | 8.40<br>(8.07, 8.73)    | 350883.32    | 7.19                                   | 1.00<br>(0.95, 1.06)    | 0.878   |                   | 1.00<br>(0.95, 1.06)    | 0.875   |                   |
| D3  | 30033                  | 2577             | 8.58<br>(8.25, 8.91)    | 351072.02    | 7.34                                   | 1.04<br>(0.99, 1.10)    | 0.163   |                   | 1.04<br>(0.98, 1.10)    | 0.172   |                   |
| D4  | 30032                  | 2561             | 8.53<br>(8.20, 8.86)    | 350967.97    | 7.30                                   | 1.01<br>(0.96, 1.07)    | 0.624   |                   | 1.01<br>(0.96, 1.07)    | 0.688   |                   |
| D5  | 30033                  | 2567             | 8.55<br>(8.22, 8.88)    | 350271.07    | 7.33                                   | 1.00<br>(0.95, 1.06)    | 0.923   |                   | 1.00<br>(0.95, 1.05)    | 0.982   |                   |
| D6  | 30033                  | 2700             | 8.99<br>(8.65, 9.33)    | 349265.61    | 7.73                                   | 1.05<br>(0.99, 1.11)    | 0.080   |                   | 1.04<br>(0.99, 1.10)    | 0.109   |                   |
| D7  | 30032                  | 2818             | 9.38<br>(9.04, 9.73)    | 348209.89    | 8.09                                   | 1.07<br>(1.01, 1.12)    | 0.017   |                   | 1.06<br>(1.01, 1.12)    | 0.028   |                   |
| D8  | 30033                  | 3018             | 10.05<br>(9.69, 10.41)  | 346453.37    | 8.71                                   | 1.10<br>(1.05, 1.16)    | <.001   |                   | 1.09<br>(1.04, 1.15)    | 0.001   |                   |
| D9  | 30033                  | 3324             | 11.07<br>(10.69, 11.44) | 343130.58    | 9.69                                   | 1.13<br>(1.07, 1.19)    | <.001   |                   | 1.12<br>(1.06, 1.18)    | <.001   |                   |
| D10 | 30032                  | 3605             | 12.00<br>(11.61, 12.40) | 337851.54    | 10.67                                  | 1.11<br>(1.05, 1.16)    | <.001   |                   | 1.10<br>(1.04, 1.15)    | <.001   |                   |
| SD  |                        |                  |                         |              |                                        |                         |         | <.001             |                         |         | <.001             |
| D1  | 29996                  | 2794             | 9.31<br>(8.97, 9.66)    | 348119.40    | 8.03                                   | 1 (reference)           |         |                   | 1 (reference)           |         |                   |
| D2  | 30058                  | 2570             | 8.55<br>(8.22, 8.88)    | 350698.78    | 7.33                                   | 1.03<br>(0.98, 1.09)    | 0.258   |                   | 1.03<br>(0.98, 1.09)    | 0.221   |                   |
| D3  | 30038                  | 2582             | 8.60<br>(8.26, 8.93)    | 350135.60    | 7.37                                   | 1.04<br>(0.98, 1.09)    | 0.213   |                   | 1.04<br>(0.99, 1.10)    | 0.146   |                   |
| D4  | 30051                  | 2503             | 8.33<br>(8.00, 8.66)    | 351316.40    | 7.12                                   | 0.99<br>(0.94, 1.05)    | 0.742   |                   | 1.00<br>(0.95, 1.05)    | 0.965   |                   |
| D5  | 30014                  | 2589             | 8.63<br>(8.29, 8.96)    | 349754.51    | 7.40                                   | 1.00<br>(0.95, 1.05)    | 0.924   |                   | 1.01<br>(0.96, 1.06)    | 0.757   |                   |
| D6  | 30041                  | 2726             | 9.07<br>(8.73, 9.41)    | 349374.49    | 7.80                                   | 1.05<br>(0.99, 1.10)    | 0.103   |                   | 1.06<br>(1.01, 1.12)    | 0.032   |                   |
| D7  | 30028                  | 2796             | 9.31<br>(8.97, 9.66)    | 348076.90    | 8.03                                   | 1.04<br>(0.98, 1.09)    | 0.189   |                   | 1.05<br>(1.00, 1.11)    | 0.052   |                   |

|     |       |      |                         |           |       |                      |       |                      |       |       |
|-----|-------|------|-------------------------|-----------|-------|----------------------|-------|----------------------|-------|-------|
| D8  | 30039 | 3000 | 9.99<br>(9.63, 10.34)   | 346803.64 | 8.65  | 1.07<br>(1.01, 1.12) | 0.017 | 1.09<br>(1.03, 1.14) | 0.002 |       |
| D9  | 30024 | 3406 | 11.34<br>(10.96, 11.73) | 342988.89 | 9.93  | 1.13<br>(1.07, 1.19) | <.001 | 1.15<br>(1.10, 1.21) | <.001 |       |
| D10 | 30037 | 3555 | 11.84<br>(11.45, 12.22) | 339735.05 | 10.46 | 1.06<br>(1.00, 1.11) | 0.034 | 1.09<br>(1.04, 1.15) | 0.001 |       |
| VIM |       |      |                         |           |       |                      |       | <.001                |       | <.001 |
| D1  | 30032 | 2801 | 9.33<br>(8.98, 9.67)    | 348495.87 | 8.04  | 1 (reference)        |       | 1 (reference)        |       |       |
| D2  | 30033 | 2566 | 8.54<br>(8.21, 8.87)    | 350429.45 | 7.32  | 1.03<br>(0.98, 1.09) | 0.272 | 1.03<br>(0.98, 1.09) | 0.236 |       |
| D3  | 30033 | 2581 | 8.59<br>(8.26, 8.93)    | 350096.73 | 7.37  | 1.03<br>(0.98, 1.09) | 0.233 | 1.04<br>(0.99, 1.10) | 0.162 |       |
| D4  | 30032 | 2499 | 8.32<br>(7.99, 8.65)    | 351112.94 | 7.12  | 0.99<br>(0.94, 1.04) | 0.695 | 1.00<br>(0.95, 1.05) | 0.913 |       |
| D5  | 30033 | 2591 | 8.63<br>(8.29, 8.96)    | 349965.16 | 7.40  | 1.00<br>(0.95, 1.05) | 0.903 | 1.01<br>(0.96, 1.06) | 0.781 |       |
| D6  | 30033 | 2728 | 9.08<br>(8.74, 9.42)    | 349265.81 | 7.81  | 1.05<br>(0.99, 1.10) | 0.103 | 1.06<br>(1.01, 1.12) | 0.032 |       |
| D7  | 30032 | 2794 | 9.30<br>(8.96, 9.65)    | 348135.40 | 8.03  | 1.03<br>(0.98, 1.09) | 0.210 | 1.05<br>(1.00, 1.11) | 0.060 |       |
| D8  | 30033 | 3000 | 9.99<br>(9.63, 10.35)   | 346728.19 | 8.65  | 1.06<br>(1.01, 1.12) | 0.018 | 1.09<br>(1.03, 1.14) | 0.002 |       |
| D9  | 30033 | 3407 | 11.34<br>(10.96, 11.73) | 343090.84 | 9.93  | 1.13<br>(1.07, 1.19) | <.001 | 1.15<br>(1.10, 1.21) | <.001 |       |
| D10 | 30032 | 3554 | 11.83<br>(11.44, 12.22) | 339683.25 | 10.46 | 1.06<br>(1.00, 1.11) | 0.037 | 1.09<br>(1.04, 1.15) | 0.001 |       |

Multivariable model (1) was adjusted for age, sex, body mass index, income levels, smoking, alcohol consumption, regular physical activity, hypertension, diabetes mellitus, dyslipidemia, stroke, atrial fibrillation, renal disease, cancer, and on lipid-lowering agent.

Multivariable model (2) was adjusted for age, sex, body mass index, income levels, smoking, alcohol consumption, regular physical activity, hypertension, diabetes mellitus, dyslipidemia, stroke, atrial fibrillation, renal disease, cancer, on lipid-lowering agent, and mean TC.

HR, hazard ratio; CI, confidence interval; CV, coefficient of variation; D, decile; SD, standard deviation; VIM, variability independent of the mean; TC, total cholesterol variability.

Table S8. The risk for the occurrence of vertebral fractures according to the quartiles of total cholesterol variability.

|     | Number of participants | Number of events | Event rate (%)<br>(95% CI) | Person-years | Incidence rate<br>(per 1000 person-years) | Adjusted HR<br>(95% CI) | <i>P</i> -value | <i>P</i> -value for trend |
|-----|------------------------|------------------|----------------------------|--------------|-------------------------------------------|-------------------------|-----------------|---------------------------|
| CV  |                        |                  |                            |              |                                           |                         |                 | <.001                     |
| Q1  | 75081                  | 3690             | 4.91<br>(4.76, 5.07)       | 891640.50    | 4.14                                      | 1 (reference)           |                 |                           |
| Q2  | 75082                  | 3534             | 4.71<br>(4.55, 4.86)       | 892073.54    | 3.96                                      | 1.01<br>(0.96, 1.05)    | 0.786           |                           |
| Q3  | 75082                  | 3853             | 5.13<br>(4.97, 5.29)       | 887983.03    | 4.34                                      | 1.06<br>(1.01, 1.11)    | 0.013           |                           |
| Q4  | 75081                  | 4843             | 6.45<br>(6.27, 6.63)       | 872670.47    | 5.55                                      | 1.12<br>(1.07, 1.17)    | <.001           |                           |
| SD  |                        |                  |                            |              |                                           |                         |                 | <.001                     |
| Q1  | 75095                  | 3764             | 5.01<br>(4.85, 5.17)       | 889917.37    | 4.23                                      | 1 (reference)           |                 |                           |
| Q2  | 75062                  | 3490             | 4.65<br>(4.50, 4.80)       | 891266.56    | 3.92                                      | 0.96<br>(0.92, 1.01)    | 0.113           |                           |
| Q3  | 75087                  | 3816             | 5.08<br>(4.92, 5.24)       | 888153.34    | 4.30                                      | 1.00<br>(0.96, 1.05)    | 0.863           |                           |
| Q4  | 75082                  | 4850             | 6.46<br>(6.28, 6.64)       | 875030.27    | 5.54                                      | 1.07<br>(1.02, 1.12)    | 0.004           |                           |
| VIM |                        |                  |                            |              |                                           |                         |                 | <.001                     |
| Q1  | 75081                  | 3764             | 5.01<br>(4.85, 5.17)       | 889755.35    | 4.23                                      | 1 (reference)           |                 |                           |
| Q2  | 75082                  | 3490             | 4.65<br>(4.49, 4.80)       | 891504.04    | 3.91                                      | 0.96<br>(0.92, 1.01)    | 0.109           |                           |
| Q3  | 75082                  | 3816             | 5.08<br>(4.92, 5.24)       | 888083.22    | 4.30                                      | 1.00<br>(0.96, 1.05)    | 0.868           |                           |
| Q4  | 75081                  | 4850             | 6.46<br>(6.28, 6.64)       | 875024.92    | 5.54                                      | 1.07<br>(1.02, 1.12)    | 0.004           |                           |

Multivariable model was adjusted for age, sex, body mass index, income levels, smoking, alcohol consumption, regular physical activity, hypertension, diabetes mellitus, dyslipidemia, stroke, atrial fibrillation, renal disease, cancer, on lipid-lowering agent, and mean TC.

HR, hazard ratio; CI, confidence interval; CV, coefficient of variation; Q, quartile; SD, standard deviation; VIM, variability independent of the mean.

Table S9. The risk for the occurrence of hip fractures according to the quartiles of total cholesterol variability.

|     | Number of participants | Number of events | Event rate (%)<br>(95% CI) | Person-years | Incidence rate<br>(per 1000 person-years) | Adjusted HR<br>(95% CI) | P-value | P-value for trend |
|-----|------------------------|------------------|----------------------------|--------------|-------------------------------------------|-------------------------|---------|-------------------|
| CV  |                        |                  |                            |              |                                           |                         |         | <.001             |
| Q1  | 75081                  | 562              | 0.75<br>(0.69, 0.81)       | 906053.50    | 0.62                                      | 1 (reference)           |         |                   |
| Q2  | 75082                  | 536              | 0.71<br>(0.65, 0.77)       | 906273.08    | 0.59                                      | 1.04<br>(0.93, 1.17)    | 0.506   |                   |
| Q3  | 75082                  | 629              | 0.84<br>(0.77, 0.90)       | 902787.68    | 0.70                                      | 1.18<br>(1.05, 1.32)    | 0.005   |                   |
| Q4  | 75081                  | 945              | 1.26<br>(1.18, 1.34)       | 890470.11    | 1.06                                      | 1.37<br>(1.23, 1.52)    | <.001   |                   |
| SD  |                        |                  |                            |              |                                           |                         |         | 0.001             |
| Q1  | 75095                  | 596              | 0.79<br>(0.73, 0.86)       | 904499.49    | 0.66                                      | 1 (reference)           |         |                   |
| Q2  | 75062                  | 562              | 0.75<br>(0.69, 0.81)       | 904961.52    | 0.62                                      | 1.03<br>(0.92, 1.16)    | 0.611   |                   |
| Q3  | 75087                  | 626              | 0.83<br>(0.77, 0.90)       | 902889.35    | 0.69                                      | 1.10<br>(0.98, 1.23)    | 0.110   |                   |
| Q4  | 75082                  | 888              | 1.18<br>(1.10, 1.26)       | 893234.01    | 0.99                                      | 1.22<br>(1.10, 1.36)    | <.001   |                   |
| VIM |                        |                  |                            |              |                                           |                         |         | 0.001             |
| Q1  | 75081                  | 596              | 0.79<br>(0.73, 0.86)       | 904337.47    | 0.66                                      | 1 (reference)           |         |                   |
| Q2  | 75082                  | 562              | 0.75<br>(0.69, 0.81)       | 905199.00    | 0.62                                      | 1.03<br>(0.92, 1.16)    | 0.617   |                   |
| Q3  | 75082                  | 626              | 0.83<br>(0.77, 0.90)       | 902819.23    | 0.69                                      | 1.10<br>(0.98, 1.23)    | 0.110   |                   |
| Q4  | 75081                  | 888              | 1.18<br>(1.10, 1.26)       | 893228.66    | 0.99                                      | 1.22<br>(1.10, 1.36)    | <.001   |                   |

Multivariable model was adjusted for age, sex, body mass index, income levels, smoking, alcohol consumption, regular physical activity, hypertension, diabetes mellitus, dyslipidemia, stroke, atrial fibrillation, renal disease, cancer, on lipid-lowering agent, and mean TC.

HR, hazard ratio; CI, confidence interval; CV, coefficient of variation; Q, quartile; SD, standard deviation; VIM, variability independent of the mean.

Table S10. The risk for the occurrence of distal radius fractures according to the quartiles of total cholesterol variability.

|     | Number of participants | Number of events | Event rate (%)<br>(95% CI) | Person-years | Incidence rate<br>(per 1000 person-years) | Adjusted HR<br>(95% CI) | <i>P</i> -value | <i>P</i> -value for trend |
|-----|------------------------|------------------|----------------------------|--------------|-------------------------------------------|-------------------------|-----------------|---------------------------|
| CV  |                        |                  |                            |              |                                           |                         |                 | 0.388                     |
| Q1  | 75081                  | 2696             | 3.59<br>(3.46, 3.73)       | 892361.23    | 3.02                                      | 1 (reference)           |                 |                           |
| Q2  | 75082                  | 2692             | 3.59<br>(3.45, 3.72)       | 892725.49    | 3.02                                      | 1.01<br>(0.96, 1.07)    | 0.605           |                           |
| Q3  | 75082                  | 2843             | 3.79<br>(3.65, 3.93)       | 888430.23    | 3.20                                      | 1.02<br>(0.97, 1.08)    | 0.446           |                           |
| Q4  | 75081                  | 3244             | 4.32<br>(4.17, 4.47)       | 874893.19    | 3.71                                      | 1.05<br>(0.99, 1.10)    | 0.091           |                           |
| SD  |                        |                  |                            |              |                                           |                         |                 | 0.199                     |
| Q1  | 75095                  | 2696             | 3.59<br>(3.45, 3.73)       | 890990.79    | 3.03                                      | 1 (reference)           |                 |                           |
| Q2  | 75062                  | 2591             | 3.45<br>(3.32, 3.58)       | 892231.85    | 2.90                                      | 0.96<br>(0.91, 1.02)    | 0.165           |                           |
| Q3  | 75087                  | 2888             | 3.85<br>(3.71, 3.99)       | 888227.15    | 3.25                                      | 1.01<br>(0.96, 1.06)    | 0.804           |                           |
| Q4  | 75082                  | 3300             | 4.40<br>(4.25, 4.55)       | 876960.35    | 3.76                                      | 1.02<br>(0.97, 1.07)    | 0.518           |                           |
| VIM |                        |                  |                            |              |                                           |                         |                 | 0.195                     |
| Q1  | 75081                  | 2696             | 3.59<br>(3.46, 3.73)       | 890828.77    | 3.03                                      | 1 (reference)           |                 |                           |
| Q2  | 75082                  | 2591             | 3.45<br>(3.32, 3.58)       | 892469.33    | 2.90                                      | 0.96<br>(0.91, 1.02)    | 0.161           |                           |
| Q3  | 75082                  | 2888             | 3.85<br>(3.71, 3.99)       | 888157.03    | 3.25                                      | 1.01<br>(0.96, 1.06)    | 0.809           |                           |
| Q4  | 75081                  | 3300             | 4.40<br>(4.25, 4.55)       | 876955.01    | 3.76                                      | 1.02<br>(0.97, 1.07)    | 0.522           |                           |

Multivariable model was adjusted for age, sex, body mass index, income levels, smoking, alcohol consumption, regular physical activity, hypertension, diabetes mellitus, dyslipidemia, stroke, atrial fibrillation, renal disease, cancer, on lipid-lowering agent, and mean TC.

HR, hazard ratio; CI, confidence interval; CV, coefficient of variation; Q, quartile; SD, standard deviation; VIM, variability independent of the mean.

Table S11. The risk for the occurrence of humerus fractures according to the quartiles of total cholesterol variability.

|     | Number of participants | Number of events | Event rate (%)<br>(95% CI) | Person-years | Incidence rate<br>(per 1000 person-years) | Adjusted HR<br>(95% CI) | P-value | P-value for trend |
|-----|------------------------|------------------|----------------------------|--------------|-------------------------------------------|-------------------------|---------|-------------------|
| CV  |                        |                  |                            |              |                                           |                         |         | 0.591             |
| Q1  | 75081                  | 397              | 0.53<br>(0.48, 0.58)       | 906182.63    | 0.44                                      | 1 (reference)           |         |                   |
| Q2  | 75082                  | 401              | 0.53<br>(0.48, 0.59)       | 906344.47    | 0.44                                      | 1.04<br>(0.91, 1.20)    | 0.565   |                   |
| Q3  | 75082                  | 391              | 0.52<br>(0.47, 0.57)       | 903224.00    | 0.43                                      | 0.98<br>(0.85, 1.12)    | 0.738   |                   |
| Q4  | 75081                  | 496              | 0.66<br>(0.60, 0.72)       | 891178.89    | 0.56                                      | 1.06<br>(0.93, 1.22)    | 0.367   |                   |
| SD  |                        |                  |                            |              |                                           |                         |         | 0.639             |
| Q1  | 75095                  | 378              | 0.50<br>(0.45, 0.55)       | 904784.40    | 0.42                                      | 1 (reference)           |         |                   |
| Q2  | 75062                  | 405              | 0.54<br>(0.49, 0.59)       | 905222.57    | 0.45                                      | 1.09<br>(0.95, 1.26)    | 0.225   |                   |
| Q3  | 75087                  | 407              | 0.54<br>(0.49, 0.59)       | 903097.78    | 0.45                                      | 1.04<br>(0.90, 1.19)    | 0.616   |                   |
| Q4  | 75082                  | 495              | 0.66<br>(0.60, 0.72)       | 893825.24    | 0.55                                      | 1.07<br>(0.93, 1.23)    | 0.347   |                   |
| VIM |                        |                  |                            |              |                                           |                         |         | 0.642             |
| Q1  | 75081                  | 378              | 0.50<br>(0.45, 0.55)       | 904622.39    | 0.42                                      | 1 (reference)           |         |                   |
| Q2  | 75082                  | 405              | 0.54<br>(0.49, 0.59)       | 905460.05    | 0.45                                      | 1.09<br>(0.95, 1.26)    | 0.227   |                   |
| Q3  | 75082                  | 407              | 0.54<br>(0.49, 0.59)       | 903027.66    | 0.45                                      | 1.04<br>(0.90, 1.19)    | 0.617   |                   |
| Q4  | 75081                  | 495              | 0.66<br>(0.60, 0.72)       | 893819.90    | 0.55                                      | 1.07<br>(0.93, 1.23)    | 0.348   |                   |

Multivariable model was adjusted for age, sex, body mass index, income levels, smoking, alcohol consumption, regular physical activity, hypertension, diabetes mellitus, dyslipidemia, stroke, atrial fibrillation, renal disease, cancer, on lipid-lowering agent, and mean TC.

HR, hazard ratio; CI, confidence interval; CV, coefficient of variation; Q, quartile; SD, standard deviation; VIM, variability independent of the mean.
